# Supplementary material for: Charge transfer and reaction coordinate construction based theoretical investigation of the eNRR and HER on cuboidal silver phosphate: a tale of two competing mechanisms
Source: Royal Society of Chemistry journal article supplement (doi:10.1039/d4se01614a), 2025-01-01
Supplement: d4se01614a1.pdf [file d4se01614a1.pdf]

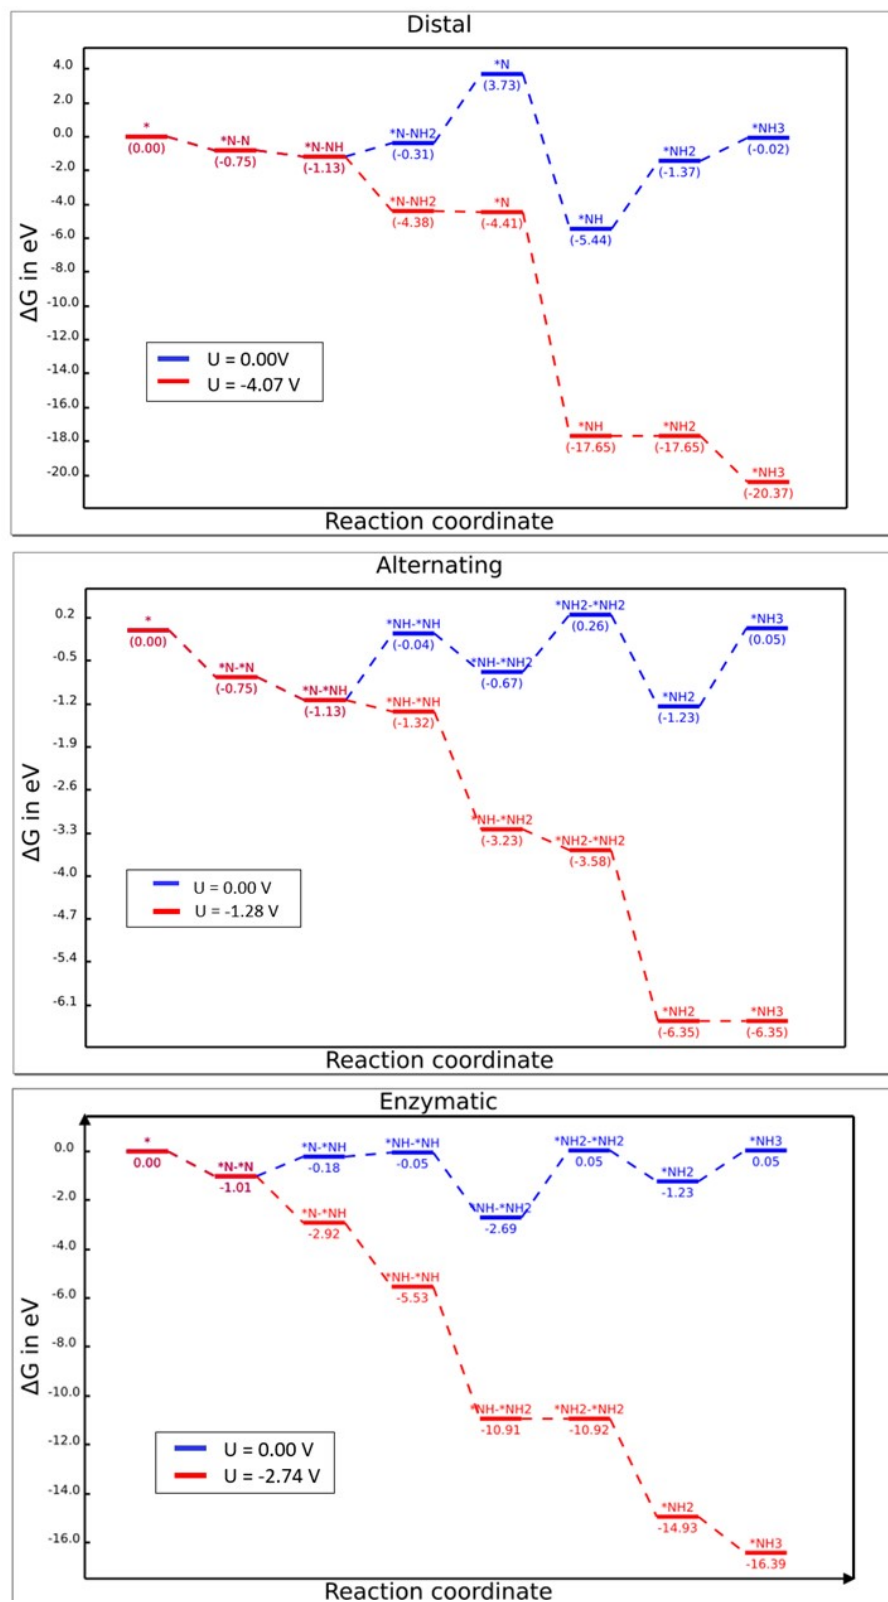

Fig. S1 Different reaction pathways (a) Distal, (b) Alternating, (c) Enzymatic pathway with corresponding limiting potential on Ag site for eNRR mechanism on  $\text{Ag}_3\text{PO}_4$  unit cell

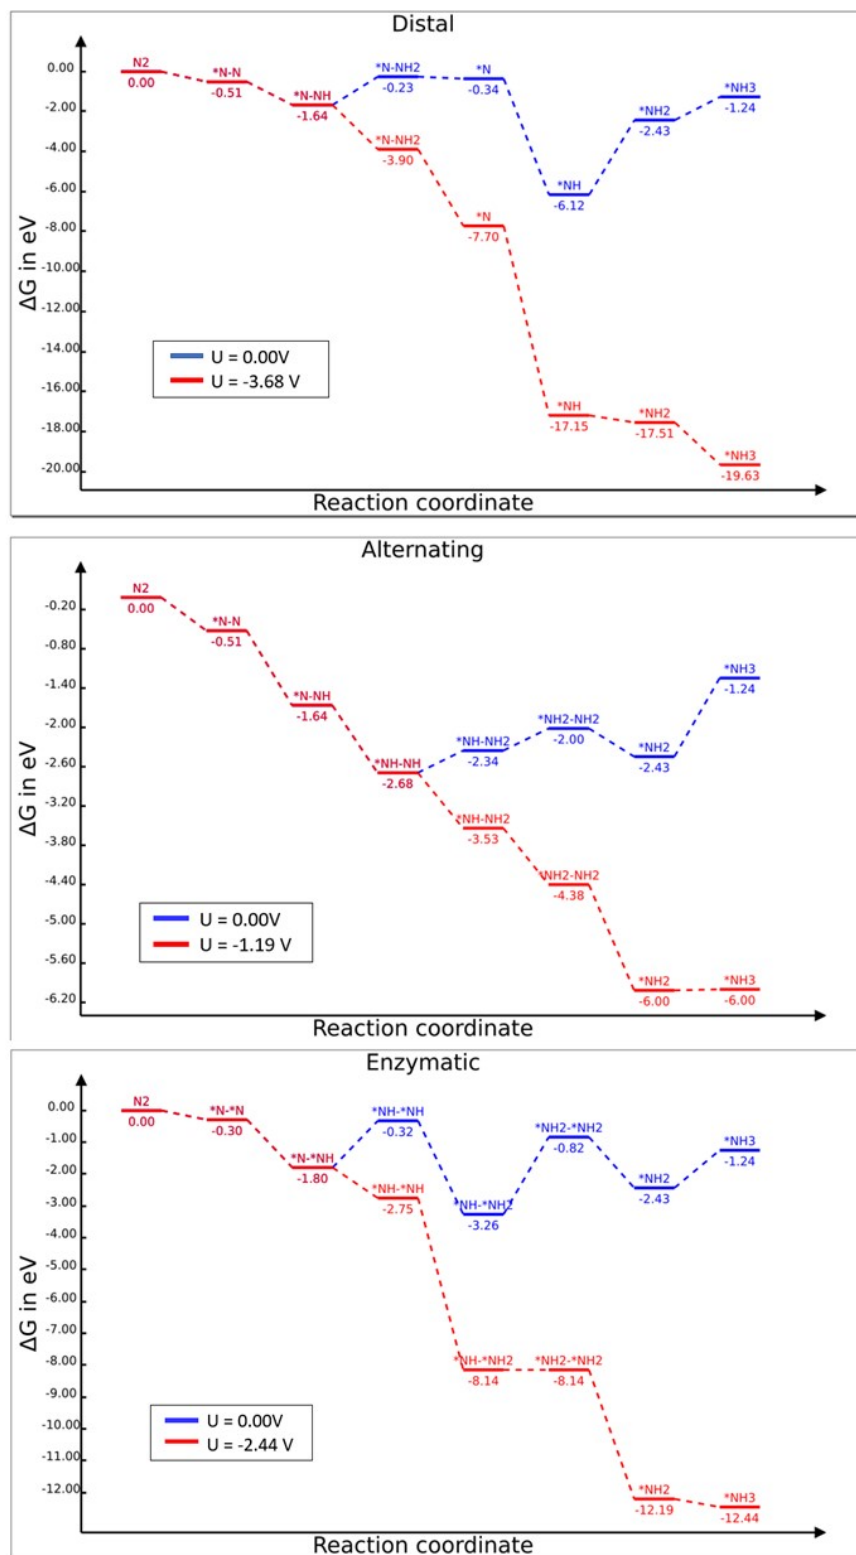

Fig. S2 Different reaction pathways (a) Distal, (b) Alternating, (c) Enzymatic pathway with corresponding limiting potential on O site for eNRR mechanism on Ag<sub>3</sub>PO<sub>4</sub> unit cell

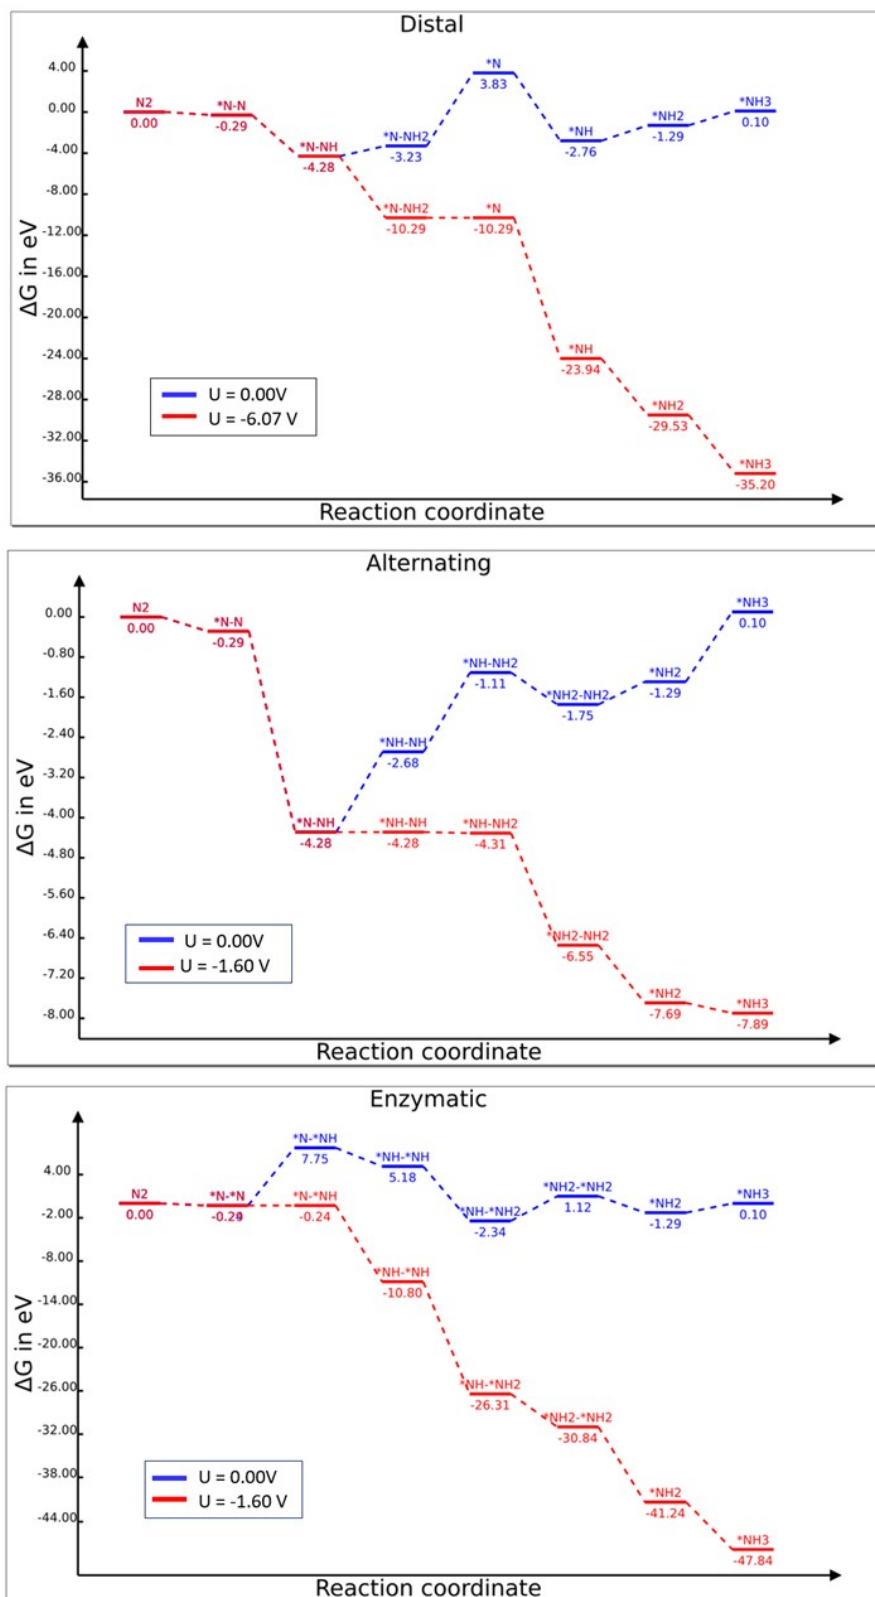

Fig. S3 Different reaction pathways (a) Distal, (b) Alternating, (c) Enzymatic pathway with corresponding limiting potential on P site for eNRR mechanism on Ag<sub>3</sub>PO<sub>4</sub> unit cell
